# Supplementary material for: Cloning, Sequencing, and Expression of Selenoprotein Transcripts in the Turkey (Meleagris gallopavo)
Source: PubMed Central journal article supplement (PMC4466519; doi:10.1371/journal.pone.0129801), 2015-06-12
Supplement: pone.0129801.s001.pdf [file pone.0129801.s001.pdf]

**S1 Table. NCBI Reference Sequences and Nomenclature for Turkey Selenoprotein Transcripts and Selenoproteins, page 1**

| <u>Gene</u>                | <u>Turkey Transcript No</u> | <u>Turkey Transcript Nomenclature</u>                                                                   | <u>Turkey Protein No</u> | <u>Turkey Protein Nomenclature</u>                                                                                              |
|----------------------------|-----------------------------|---------------------------------------------------------------------------------------------------------|--------------------------|---------------------------------------------------------------------------------------------------------------------------------|
| <b>GPX1</b>                | XM_003210002.2              | PREDICTED: Meleagris gallopavo glutathione peroxidase 1 (GPX1), mRNA                                    | XP_003210050.2           | PREDICTED: LOW QUALITY PROTEIN: glutathione peroxidase 1 [Meleagris gallopavo]                                                  |
| <b>GPX2</b>                | XM_010710801.1              | PREDICTED: Meleagris gallopavo glutathione peroxidase 2 (gastrointestinal) (GPX2), mRNA                 | XP_010709103.1           | PREDICTED: LOW QUALITY PROTEIN: glutathione peroxidase 2 [Meleagris gallopavo]                                                  |
| <b>GPX3</b>                | XM_010719196.1              | PREDICTED: Meleagris gallopavo glutathione peroxidase 3 (plasma) (GPX3), mRNA                           | XP_010717498.1           | PREDICTED: LOW QUALITY PROTEIN: glutathione peroxidase 3 [Meleagris gallopavo]                                                  |
| <b>GPX4</b>                | XM_010724964.1              | PREDICTED: Meleagris gallopavo glutathione peroxidase 4 (GPX4), partial mRNA                            | XP_010723266.1           | PREDICTED: LOW QUALITY PROTEIN: phospholipid hydroperoxide glutathione peroxidase, mitochondrial, partial [Meleagris gallopavo] |
| <b>DIO1</b>                | XM_003208875.2              | PREDICTED: Meleagris gallopavo deiodinase, iodothyronine, type I (DIO1), mRNA                           | XP_003208923.1           | PREDICTED: LOW QUALITY PROTEIN: type I iodothyronine deiodinase [Meleagris gallopavo]                                           |
| <b>DIO2</b>                | XM_003206645.2              | PREDICTED: Meleagris gallopavo deiodinase, iodothyronine, type II (DIO2), mRNA                          | XP_003206693.2           | PREDICTED: LOW QUALITY PROTEIN: type II iodothyronine deiodinase [Meleagris gallopavo]                                          |
| <b>DIO3</b>                | XM_010712037.1              | PREDICTED: Meleagris gallopavo deiodinase, iodothyronine, type III (DIO3), partial mRNA                 | XP_010710339.1           | PREDICTED: LOW QUALITY PROTEIN: type III iodothyronine deiodinase, partial [Meleagris gallopavo]                                |
| <b>SELH<br/>C5H11orf31</b> | XM_010711191.1              | PREDICTED: Meleagris gallopavo chromosome 5 open reading frame, human C11orf31 (C5H11orf31), mRNA       | XP_010709493.1           | PREDICTED: LOW QUALITY PROTEIN: selenoprotein H [Meleagris gallopavo]                                                           |
| <b>EPT1<br/>SELI</b>       | XM_003204565.2              | PREDICTED: Meleagris gallopavo ethanolaminephosphotransferase 1 (CDP-ethanolaminespecific) (EPT1), mRNA | XP_003204613.2           | PREDICTED: ethanolaminephosphotransferase 1 [Meleagris gallopavo]                                                               |

**S1 Table. NCBI Reference Sequences and Nomenclature for Turkey Selenoprotein Transcripts and Selenoproteins, page 1**

| <b>Gene</b>                  | <b>Turkey Transcript No</b> | <b>Turkey Transcript Nomenclature</b>                                                        | <b>Turkey Protein No</b> | <b>Turkey Protein Nomenclature</b>                                                     |
|------------------------------|-----------------------------|----------------------------------------------------------------------------------------------|--------------------------|----------------------------------------------------------------------------------------|
| <b>SELK<br/>LOC100544511</b> | XM_003210062.2              | PREDICTED: Meleagris gallopavo selenoprotein K (LOC100544511), mRNA                          | XP_003210110.1           | PREDICTED: selenoprotein K [Meleagris gallopavo]                                       |
| <b>SELM<br/>LOC100546114</b> | XM_010720450.1              | PREDICTED: Meleagris gallopavo selenoprotein M (LOC100546114), partial mRNA                  | XP_010718752.1           | PREDICTED: LOW QUALITY PROTEIN: selenoprotein M, partial [Meleagris gallopavo]         |
| <b>SELO<br/>LOC100539640</b> | XM_010706172.1              | PREDICTED: Meleagris gallopavo selenoprotein O (LOC100539640), mRNA                          | XP_010704474.1           | PREDICTED: selenoprotein O [Meleagris gallopavo]                                       |
| <b>VIMP<br/>SELS</b>         | XM_010717651.1              | PREDICTED: Meleagris gallopavo VCP-interacting membrane protein (VIMP), partial mRNA         | XP_010715953.1           | PREDICTED: selenoprotein S, partial [Meleagris gallopavo]                              |
| <b>SELT<br/>LOC100548711</b> | XM_010717099.1              | PREDICTED: Meleagris gallopavo selenoprotein T (LOC100548711), mRNA                          | XP_010715401.1           | PREDICTED: selenoprotein T [Meleagris gallopavo]                                       |
| <b>SELU<br/>FAM213A</b>      | XM_010714114.1              | PREDICTED: Meleagris gallopavo family with sequence similarity 213, member A (FAM213A), mRNA | XP_010712416.1           | PREDICTED: LOW QUALITY PROTEIN: redox-regulatory protein FAM213A [Meleagris gallopavo] |
| <b>MSRB1<br/>SEPX1</b>       | XM_010719532.1              | PREDICTED: Meleagris gallopavo methionine sulfoxide reductase B1 (MSRB1), mRNA               | XP_010717834.1           | PREDICTED: methionine-R-sulfoxide reductase B1 [Meleagris gallopavo]                   |
| <b>SEP15</b>                 | XM_010715957.1              | PREDICTED: Meleagris gallopavo 15 kDa selenoprotein (LOC100547530), mRNA                     | XP_010714259.1           | PREDICTED: LOW QUALITY PROTEIN: 15 kDa selenoprotein [Meleagris gallopavo]             |
| <b>SEPN1</b>                 | XM_010723449.1              | PREDICTED: Meleagris gallopavo selenoprotein N, 1 (SEPN1), mRNA                              | XP_010721751.1           | PREDICTED: LOW QUALITY PROTEIN: selenoprotein N [Meleagris gallopavo]                  |
| <b>SEPP1</b>                 | XM_010725387.1              | PREDICTED: Meleagris gallopavo selenoprotein P, plasma, 1 (SEPP1), mRNA                      | XP_010723689.1           | PREDICTED: LOW QUALITY PROTEIN: selenoprotein P [Meleagris gallopavo]                  |

**S1 Table. NCBI Reference Sequences and Nomenclature for Turkey Selenoprotein Transcripts and Selenoproteins, page 1**

| <u>Gene</u>   | <u>Turkey Transcript No</u> | <u>Turkey Transcript Nomenclature</u>                                                                    | <u>Turkey Protein No</u> | <u>Turkey Protein Nomenclature</u>                                          |
|---------------|-----------------------------|----------------------------------------------------------------------------------------------------------|--------------------------|-----------------------------------------------------------------------------|
| <b>SEPP2</b>  | XM_010716185.1              | PREDICTED: Meleagris gallopavo selenoprotein Pb-like (LOC100546913), mRNA                                | XP_010714487.1           | PREDICTED: LOW QUALITY PROTEIN: selenoprotein Pb-like [Meleagris gallopavo] |
| <b>SEPW1</b>  | XR_796429.1                 | PREDICTED: Meleagris gallopavo uncharacterized LOC104915679 (LOC104915679), transcript variant X1, ncRNA |                          |                                                                             |
| <b>TXNRD1</b> | XM_010712365.1              | PREDICTED: Meleagris gallopavo thioredoxin reductase 1 (TXNRD1), mRNA                                    | XP_010710667.1           | PREDICTED: thioredoxin reductase 1, cytoplasmic [Meleagris gallopavo]       |
| <b>TXNRD2</b> | XM_003210867.2              | PREDICTED: Meleagris gallopavo thioredoxin reductase 2 (TXNRD2), mRNA                                    | XP_003210915.2           | PREDICTED: thioredoxin reductase 2, mitochondrial [Meleagris gallopavo]     |
| <b>TXNRD3</b> | XM_010718544.1              | PREDICTED: Meleagris gallopavo thioredoxin reductase 3 (TXNRD3), mRNA                                    | XP_010716846.1           | PREDICTED: thioredoxin reductase 3 [Meleagris gallopavo]                    |
| <b>SEPHS1</b> | XM_010717360.1              | PREDICTED: Meleagris gallopavo selenophosphate synthetase 1 (SEPHS1), mRNA                               | XP_010715662.1           | PREDICTED: selenide, water dikinase 1 [Meleagris gallopavo]                 |
