# Supplementary material for: Cloning, Sequencing, and Expression of Selenoprotein Transcripts in the Turkey (Meleagris gallopavo)
Source: PubMed Central journal article supplement (PMC4466519; doi:10.1371/journal.pone.0129801), 2015-06-12
Supplement: pone.0129801.s002.pdf [file pone.0129801.s002.pdf]

**S2 Table. NCBI Reference Sequences and Nomenclature for Chicken Selenoprotein Transcripts and Turkey Selenoprotein Genes, page 1**

| <u>Gene</u> | <u>Chicken Transcript No</u> | <u>Chicken Transcript Nomenclature</u>                                 | <u>Turkey Gene No</u> | <u>Turkey Gene Nomenclature</u>                                                                                                                            |
|-------------|------------------------------|------------------------------------------------------------------------|-----------------------|------------------------------------------------------------------------------------------------------------------------------------------------------------|
| <b>GPX1</b> | NM_001277853.1               | Gallus gallus glutathione peroxidase 1 (GPX1), mRNA                    | NC_015024.2           | Meleagris gallopavo isolate NT-WF06-2002-E0010 breed Aviagen turkey brand Nicholas breeding stock chromosome 14, Turkey_5.0, whole genome shotgun sequence |
| <b>GPX2</b> | NM_001277854                 | Gallus gallus glutathione peroxidase 2 (gastrointestinal) (GPX2), mRNA | NC_015015.2           | Meleagris gallopavo isolate NT-WF06-2002-E0010 breed Aviagen turkey brand Nicholas breeding stock chromosome 5, Turkey_5.0, whole genome shotgun sequence  |
| <b>GPX3</b> | NM_001163232.2               | Gallus gallus glutathione peroxidase 3 (GPX3), mRNA                    | NC_015025.2           | Meleagris gallopavo isolate NT-WF06-2002-E0010 breed Aviagen turkey brand Nicholas breeding stock chromosome 15, Turkey_5.0, whole genome shotgun sequence |
| <b>GPX4</b> | XM_003642871.2               | PREDICTED: Gallus gallus glutathione peroxidase 4 (GPX4), mRNA         | NC_015040.2           | Meleagris gallopavo isolate NT-WF06-2002-E0010 breed Aviagen turkey brand Nicholas breeding stock chromosome 30, Turkey_5.0, whole genome shotgun sequence |
| <b>DIO1</b> | NM_001097614.1               | Gallus gallus deiodinase, iodothyronine, type I (DIO1), mRNA           | NC_015020.2           | Meleagris gallopavo isolate NT-WF06-2002-E0010 breed Aviagen turkey brand Nicholas breeding stock chromosome 10, Turkey_5.0, whole genome shotgun sequence |
| <b>DIO2</b> | NM_204114.3                  | Gallus gallus deiodinase, iodothyronine, type II (DIO2), mRNA          | NC_015015.2           | Meleagris gallopavo isolate NT-WF06-2002-E0010 breed Aviagen turkey brand Nicholas breeding stock chromosome 5, Turkey_5.0, whole genome shotgun sequence  |

**S2 Table. NCBI Reference Sequences and Nomenclature for Chicken Selenoprotein Transcripts and Turkey Selenoprotein Genes, page 1**

| <u>Gene</u>                  | <u>Chicken Transcript No</u> | <u>Chicken Transcript Nomenclature</u>                                                  | <u>Turkey Gene No</u> | <u>Turkey Gene Nomenclature</u>                                                                                                                            |
|------------------------------|------------------------------|-----------------------------------------------------------------------------------------|-----------------------|------------------------------------------------------------------------------------------------------------------------------------------------------------|
| <b>DIO3</b>                  | NM_001122648.1               | Gallus gallus deiodinase, iodothyronine, type III (DIO3), mRNA                          | NC_015015.2           | Meleagris gallopavo isolate NT-WF06-2002-E0010 breed Aviagen turkey brand Nicholas breeding stock chromosome 5, Turkey_5.0, whole genome shotgun sequence  |
| <b>SELH<br/>C5H11orf31</b>   | NM_001277865.1               | Gallus gallus selenoprotein H-like (LOC100858006), mRNA                                 | NC_015015.2           | Meleagris gallopavo isolate NT-WF06-2002-E0010 breed Aviagen turkey brand Nicholas breeding stock chromosome 5, Turkey_5.0, whole genome shotgun sequence  |
| <b>EPT1<br/>SELI</b>         | NM_001031528.2               | Gallus gallus ethanolaminephosphotransferase 1 (CDP-ethanolamine-specific) (EPT1), mRNA | NC_015012.2           | Meleagris gallopavo isolate NT-WF06-2002-E0010 breed Aviagen turkey brand Nicholas breeding stock chromosome 2, Turkey_5.0, whole genome shotgun sequence  |
| <b>SELK<br/>LOC100544511</b> | NM_001025441.2               | Gallus gallus selenoprotein K (SELK), mRNA                                              | NC_015024.2           | Meleagris gallopavo isolate NT-WF06-2002-E0010 breed Aviagen turkey brand Nicholas breeding stock chromosome 14, Turkey_5.0, whole genome shotgun sequence |
| <b>SELM<br/>LOC100546114</b> | NM_001277859.1               | Gallus gallus selenoprotein M (SELM), mRNA                                              | NC_015027.2           | Meleagris gallopavo isolate NT-WF06-2002-E0010 breed Aviagen turkey brand Nicholas breeding stock chromosome 17, Turkey_5.0, whole genome shotgun sequence |
| <b>SELO<br/>LOC100539640</b> | NM_001115017.1               | Gallus gallus selenoprotein O (SELO), mRNA                                              | NC_015011.2           | Meleagris gallopavo isolate NT-WF06-2002-E0010 breed Aviagen turkey brand Nicholas breeding stock chromosome 1, Turkey_5.0, whole genome shotgun sequence  |

**S2 Table. NCBI Reference Sequences and Nomenclature for Chicken Selenoprotein Transcripts and Turkey Selenoprotein Genes, page 1**

| <u>Gene</u>                  | <u>Chicken Transcript No</u> | <u>Chicken Transcript Nomenclature</u>                                                                                                                                                                       | <u>Turkey Gene No</u> | <u>Turkey Gene Nomenclature</u>                                                                                                                            |
|------------------------------|------------------------------|--------------------------------------------------------------------------------------------------------------------------------------------------------------------------------------------------------------|-----------------------|------------------------------------------------------------------------------------------------------------------------------------------------------------|
| <b>VIMP<br/>SELS</b>         | NM_001024734.2               | Gallus gallus VCP-interacting membrane protein (VIMP), mRNA                                                                                                                                                  | NC_015022.2           | Meleagris gallopavo isolate NT-WF06-2002-E0010 breed Aviagen turkey brand Nicholas breeding stock chromosome 12, Turkey_5.0, whole genome shotgun sequence |
| <b>SELT<br/>LOC100548711</b> | NM_001006557.3               | Gallus gallus selenoprotein T (SELT), mRNA                                                                                                                                                                   | NC_015021.2           | Meleagris gallopavo isolate NT-WF06-2002-E0010 breed Aviagen turkey brand Nicholas breeding stock chromosome 11, Turkey_5.0, whole genome shotgun sequence |
| <b>SELU<br/>FAM213A</b>      | NM_001193518.1, l            | Gallus gallus chromosome 6 open reading frame, human C10orf58 (C10ORF58), transcript variant 1, mRNA, Gallus gallus chromosome 6 open reading frame, human C10orf58 (C6H10orf58), transcript variant 2, mRNA | NC_015018.2           | Meleagris gallopavo isolate NT-WF06-2002-E0010 breed Aviagen turkey brand Nicholas breeding stock chromosome 8, Turkey_5.0, whole genome shotgun sequence  |
| <b>MSRB1<br/>SEPX1</b>       | NM_001135558.2               | Gallus gallus methionine sulfoxide reductase B1 (MSRB1), mRNA                                                                                                                                                | NC_015026.2           | Meleagris gallopavo isolate NT-WF06-2002-E0010 breed Aviagen turkey brand Nicholas breeding stock chromosome 16, Turkey_5.0, whole genome shotgun sequence |
| <b>SEP15</b>                 | NM_001012926.2               | Gallus gallus 15 kDa selenoprotein (SEP15), mRNA                                                                                                                                                             | NC_015020.2           | Meleagris gallopavo isolate NT-WF06-2002-E0010 breed Aviagen turkey brand Nicholas breeding stock chromosome 10, Turkey_5.0, whole genome shotgun sequence |
| <b>SEPN1</b>                 | NM_001114972.1               | Gallus gallus selenoprotein N, 1 (SEPN1), mRNA                                                                                                                                                               | NC_015035.2           | Meleagris gallopavo isolate NT-WF06-2002-E0010 breed Aviagen turkey brand Nicholas breeding stock chromosome 25, Turkey_5.0, whole genome shotgun sequence |

**S2 Table. NCBI Reference Sequences and Nomenclature for Chicken Selenoprotein Transcripts and Turkey Selenoprotein Genes, page 1**

| <u>Gene</u>   | <u>Chicken Transcript No</u> | <u>Chicken Transcript Nomenclature</u>                                                            | <u>Turkey Gene No</u> | <u>Turkey Gene Nomenclature</u>                                                                                                                            |
|---------------|------------------------------|---------------------------------------------------------------------------------------------------|-----------------------|------------------------------------------------------------------------------------------------------------------------------------------------------------|
| <b>SEPP1</b>  | NM_001031609.2               | Gallus gallus selenoprotein P, plasma, 1 (SEPP1), mRNA                                            | NC_015041.2           | Meleagris gallopavo isolate NT-WF06-2002-E0010 breed Aviagen turkey brand Nicholas breeding stock chromosome Z, Turkey_5.0, whole genome shotgun sequence  |
| <b>SEPP2</b>  |                              |                                                                                                   | NC_015020.2           | Meleagris gallopavo isolate NT-WF06-2002-E0010 breed Aviagen turkey brand Nicholas breeding stock chromosome 10, Turkey_5.0, whole genome shotgun sequence |
| <b>SEPW1</b>  | NM_001166327.1               | Gallus gallus selenoprotein W, 1 (SEPW1), mRNA                                                    |                       |                                                                                                                                                            |
| <b>TXNRD1</b> | NM_001030762.2               | Gallus gallus thioredoxin reductase 1 (TXNRD1), mRNA                                              | NC_015011.2           | Meleagris gallopavo isolate NT-WF06-2002-E0010 breed Aviagen turkey brand Nicholas breeding stock chromosome 1, Turkey_5.0, whole genome shotgun sequence  |
| <b>TXNRD2</b> | NM_001122691.1               | Gallus gallus thioredoxin reductase 2 (TXNRD2), nuclear gene encoding mitochondrial protein, mRNA | NC_015027.2           | Meleagris gallopavo isolate NT-WF06-2002-E0010 breed Aviagen turkey brand Nicholas breeding stock chromosome 17, Turkey_5.0, whole genome shotgun sequence |
| <b>TXNRD3</b> | NM_001122777.1               | Gallus gallus thioredoxin reductase 3 (TXNRD3), mRNA                                              | NC_015024.2           | Meleagris gallopavo isolate NT-WF06-2002-E0010 breed Aviagen turkey brand Nicholas breeding stock chromosome 14, Turkey_5.0, whole genome shotgun sequence |
| <b>SEPHS1</b> | NM_001164084.1               | Gallus gallus selenophosphate synthetase 1 (SEPHS1), mRNA                                         | NC_015011.2           | Meleagris gallopavo isolate NT-WF06-2002-E0010 breed Aviagen turkey brand Nicholas breeding stock chromosome 1, Turkey_5.0, whole genome shotgun sequence  |
