# Supplementary material for: Cloning, Sequencing, and Expression of Selenoprotein Transcripts in the Turkey (Meleagris gallopavo)
Source: PubMed Central journal article supplement (PMC4466519; doi:10.1371/journal.pone.0129801), 2015-06-12
Supplement: pone.0129801.s003.pdf [file pone.0129801.s003.pdf]

**S3 Table. Sequence Identity of Turkey Selenoprotein Transcripts relative to Chicken, Human, and Mouse sequences**

| Gene   | Alias        | CDS<br>bp        | Chicken ( <i>Gallus gallus</i> ) |                                | Human ( <i>Homo sapiens</i> ) |                                | Mouse ( <i>Mus musculus</i> ) |                                |
|--------|--------------|------------------|----------------------------------|--------------------------------|-------------------------------|--------------------------------|-------------------------------|--------------------------------|
|        |              |                  | % <sup>1</sup>                   | Sequence No.                   | % <sup>1</sup>                | Sequence No.                   | % <sup>1</sup>                | Sequence No.                   |
| GPX1   |              | 588              | 97                               | <a href="#">NM_001277853.1</a> | 78.5 <sup>2</sup>             | <a href="#">NM_000581.2</a>    | 75                            | <a href="#">NM_008160.6</a>    |
| GPX2   |              | 576              | 97                               | <a href="#">NM_001277854.1</a> | 75                            | <a href="#">NM_002083.3</a>    | 74                            | <a href="#">NM_030677.2</a>    |
| GPX3   |              | 660              | 98                               | <a href="#">NM_001163232.2</a> | 74                            | <a href="#">NM_002084.3</a>    | 74                            | <a href="#">NM_008161.3</a>    |
| GPX4   |              | 579              | 95                               | <a href="#">AF498316.2</a>     | 76.5 <sup>2</sup>             | <a href="#">NM_001039848.1</a> | 75                            | <a href="#">NM_001037741.2</a> |
| DIO1   |              | 741              | 95                               | <a href="#">NM_001097614.1</a> | 69                            | <a href="#">NM_000792.5</a>    | 69                            | <a href="#">NM_007860.3</a>    |
| DIO2   |              | 1213             | 94                               | <a href="#">NM_204114.3</a>    | 78.5 <sup>2</sup>             | <a href="#">NM_001242503.1</a> | 78                            | <a href="#">NM_010050.2</a>    |
| DIO3   |              | 772              | 99                               | <a href="#">NM_001122648.1</a> | 76                            | <a href="#">NM_001242503.1</a> | 69                            | <a href="#">NM_172119.2</a>    |
| SELH   | C5H11orf31   | 178              | 97                               | <a href="#">NM_001277865.1</a> | 73                            | <a href="#">NM_170746.2</a>    | 67                            | <a href="#">NM_001037279.1</a> |
| EPT1   | SELI         | 631              | 97                               | <a href="#">NM_001031528.2</a> | 72                            | <a href="#">NM_033505.2</a>    | 72                            | <a href="#">NM_027652.2</a>    |
| SELK   | LOC100544511 | 288              | 97                               | <a href="#">NM_001025441.2</a> | 74                            | <a href="#">NM_021237.3</a>    | 71                            | <a href="#">NM_019979.2</a>    |
| SELM   | LOC100546114 | 395              | 97                               | <a href="#">NM_001277859.1</a> | 77                            | <a href="#">NM_080430.2</a>    | 75                            | <a href="#">NM_053267.2</a>    |
| SELO   | LOC100539640 | 1470             | 96                               | <a href="#">NM_001115017.1</a> | 70                            | <a href="#">NM_031454.1</a>    | 71                            | <a href="#">NM_027905.2</a>    |
| VIMP   | SELS         | 132              | 96                               | <a href="#">NM_001024734.2</a> | 79                            | <a href="#">NM_203472.2</a>    | 79                            | <a href="#">NM_024439.3</a>    |
| SELT   | LOC100548711 | 281              | 99                               | <a href="#">NM_001006557.3</a> | 91                            | <a href="#">NM_016275.3</a>    | 90                            | <a href="#">NM_001040396.2</a> |
| SELU   | FAM213A      | 690              | 96                               | <a href="#">NM_001193518.1</a> | 73                            | <a href="#">NM_032333.4</a>    | 71                            | <a href="#">NM_027464.3</a>    |
| MSRB1  | SEPX1        | 507 <sup>3</sup> | 92                               | <a href="#">NM_001135558.2</a> |                               | none <sup>3</sup>              |                               | none <sup>3</sup>              |
| SEP15  |              | 483              | 97                               | <a href="#">NM_001012926.2</a> | 76                            | <a href="#">NM_004261.3</a>    | 82                            | <a href="#">NM_053102.2</a>    |
| SEPN1  |              | 955              | 98                               | <a href="#">NM_001114972.1</a> | 80                            | <a href="#">NM_206926.1</a>    | 78                            | <a href="#">NM_029100.2</a>    |
| SEPP1  |              | 1000             | 95                               | <a href="#">NM_001031609.2</a> | 79                            | <a href="#">NM_005410.2</a>    | 74                            | <a href="#">NM_009155.3</a>    |
| SEPP2  |              | 329              | 95                               | <a href="#">XM_003641687.2</a> |                               | None <sup>4</sup>              |                               | None <sup>4</sup>              |
| SEPW1  |              | 258              | 96                               | <a href="#">NM_001166327.1</a> | 67                            | <a href="#">NM_003009.2</a>    | 67                            | <a href="#">NM_009156.2</a>    |
| TXNRD1 |              | 1027             | 97                               | <a href="#">NM_001030762.2</a> | 80                            | <a href="#">NM_003330.3</a>    | 76                            | <a href="#">NM_001042523.1</a> |
| TXNRD2 |              | 1354             | 95                               | <a href="#">NM_001122691.1</a> | 70                            | <a href="#">NM_006440.4</a>    | 71                            | <a href="#">NM_013711.3</a>    |
| TXNRD3 |              | 503 <sup>3</sup> | 93                               | <a href="#">NM_001122777.1</a> |                               | none <sup>3</sup>              |                               | none <sup>3</sup>              |
| SEPHS1 |              | 1179             | 98                               | <a href="#">NM_001164084.1</a> | 82                            | <a href="#">NM_012247.4</a>    | 82                            | <a href="#">NM_175400.6</a>    |

<sup>1</sup>Sequence identity, using the turkey transcript coding sequence (CDS) from the present study, was determined using NCBI BLAST (<http://blast.ncbi.nlm.nih.gov/Blast.cgi>) against the *Gallus gallus* (taxid:9031), *Homo sapiens* (taxid:9606), and *Mus musculus* (taxid:10090) databases

<sup>2</sup>Non-integer values are the mean sequence identity for transcripts with multiple human variants

<sup>3</sup>For cloned transcripts that only contained 3'UTR sequences, identities were determined using the 3'UTR sequence only against the chicken database.

<sup>4</sup>SEPP2 gene/transcript not found in the human or mouse.
